# Supplementary material for: UK osteopathic practice in 2019: a retrospective analysis of practice data
Source: bioRxiv or medRxiv preprint supplement (doi:10.1101/2021.01.28.21250601), 2021-01-29
Supplement: Supplementary file [file media-1.pdf]

## Questionnaire survey content

Part A provided full information about the survey and obtained consent.

Part B included questions about:

- Osteopath's gender, age, and nationality
- Number of years of experience as an osteopath after initial graduation
- Practicing status
- Academic qualifications
- Working status as an osteopath (i.e. independent, employee)
- Location of practice (urban or rural)
- Practice environment (i.e. private practice, group practice with other osteopaths, interdisciplinary practice, clinic, hospital)

Part C included questions about:

- Description of patient and underlying condition:
  - Month of encounter for selected patient
  - Patient's age
  - Patient's gender
  - Primary reason for consultation
  - Co-existing known conditions
  - Duration of actual episode
  - Type of onset of symptoms
  - Localisation of symptoms
  - Impact of symptoms on daily life
  - Prior care for actual episode
  - Any health professional who referred the patient
- Description of first encounter:
  - Informed consent for examination and treatment
  - Treatment techniques employed during first encounter
  - Use of adjunct therapies
  - Recommendation of self-management strategies
  - Duration of first encounter
- Subsequent encounters:

- Number of encounters for primary reason for consultation
- Number of subsequent treatments (including adjunct therapies and self-management strategies)
- If applicable, description of referral to other health professional
